# Supplementary material for: α-Synuclein binds to the ER–mitochondria tethering protein VAPB to disrupt Ca2+ homeostasis and mitochondrial ATP production
Source: PubMed Central journal article supplement (PMC5486644; doi:10.1007/s00401-017-1704-z), 2017-03-23

# Supplemental Figure 1

**a**

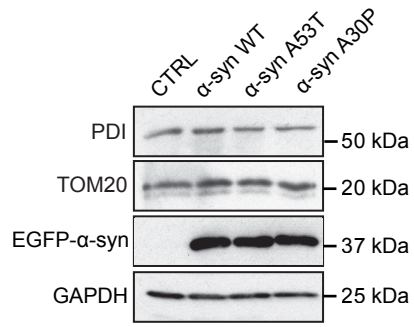

**b**

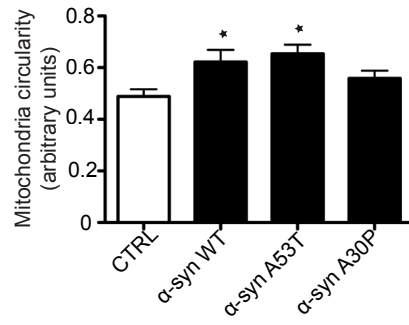

**c**

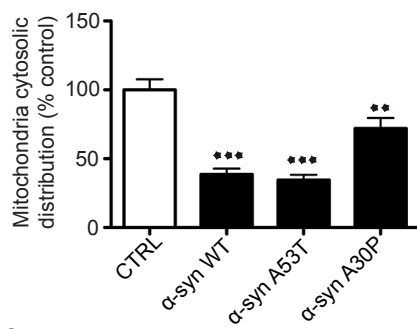

**d**

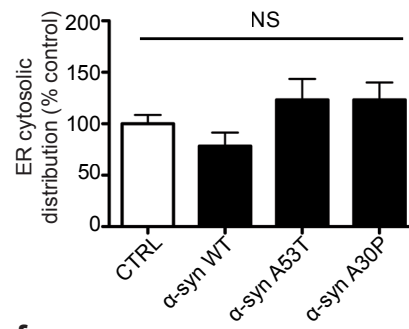

**e**

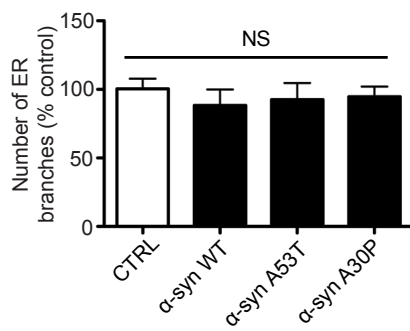

**f**

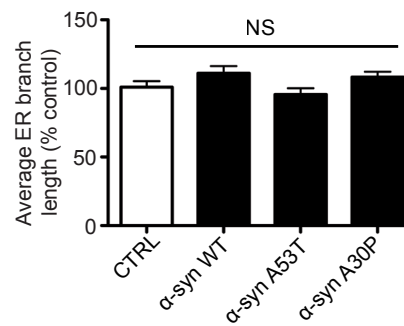

Supplement: 401_2017_1704_MOESM1_ESM.pdf [file 401_2017_1704_MOESM1_ESM.pdf]
