# Supplementary material for: α-Synuclein binds to the ER–mitochondria tethering protein VAPB to disrupt Ca2+ homeostasis and mitochondrial ATP production
Source: Springer Nature journal article supplement (doi:10.1007/s00401-017-1704-z), 2017-03-23

Supplemental Figure 3

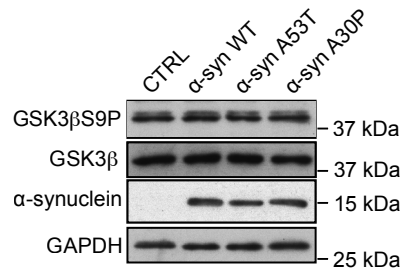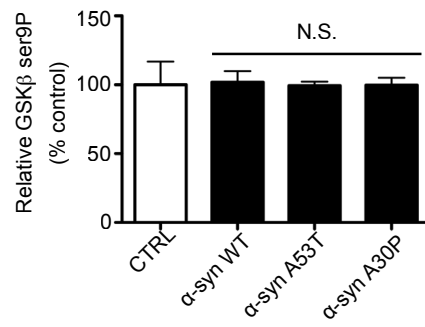

Supplement: MOESM3 [file 12171860]
